# Supplementary material for: From Traditional to Digital: Examining the Transformation of Sociocultural Barriers and Facilitators in Healthcare Technology Adoption
Source: Research Square preprint supplement (doi:10.21203/rs.3.rs-6995030/v1), 2025-07-28
Supplement: Supplementary file 1 [file 033113001450d5d2ffd81eb8.docx]

**Supplemental Materials**

**Text 1. Reflexivity Statement**

As a research team of six individuals, we acknowledge the importance of reflecting on our backgrounds, identities, and experiences that may influence our study on health disparities and digital tools. We come from diverse academic, cultural, and professional backgrounds, and our perspectives may shape our understanding of the subject matter. Within our diverse group, some have lived experiences related to healthcare disparities, while others have expertise in digital technology. These varied individual perspectives could impact our data collection, analysis, and interpretation.

We commit to ongoing self-reflection and open dialogue within our team to mitigate potential biases. We recognize that our beliefs and experiences should not influence the research process and findings. Additionally, we will document and discuss any personal biases or preconceptions that arise during the research to maintain the integrity of our analysis. We acknowledge our power and privilege as researchers and aim to use cultural proficiency to analyze participants’ diverse experiences. We aim to conduct this research with transparency and rigor, acknowledging that our perspectives are part of the context of our study. By doing so, we seek to enhance the credibility and trustworthiness of our research findings.

**Table 1. Interrater Reliability Metrics for Double-Coded Transcripts**

| **Coder 1** | **Coder 2** | **Document name** | **Agreements** | **Disagreements** | **Percent** | **Kappa (RK)** |
| --- | --- | --- | --- | --- | --- | --- |
| AV | JD | STTR1_03_002 | 129 | 40 | 76.33 | 0.76 |
| AV | JD | STTR1_02_001 | 132 | 37 | 78.11 | 0.78 |
| AV | JD | STTR1_01_003 | 141 | 28 | 83.43 | 0.83 |
| PZ | AV | STTR1_04_010 | 131 | 38 | 77.51 | 0.78 |
| PZ | AV | STTR1_05_014 | 138 | 31 | 81.66 | 0.82 |
| ZB | PZ | STTR1_06_020 | 145 | 24 | 85.8 | 0.86 |
| ZB | PZ | STTR1_08_019 | 134 | 35 | 79.29 | 0.79 |
| ZB | JD | STTR1_09_024 | 127 | 42 | 75.15 | 0.75 |
| ZB | JD | STTR1_10_027 | 137 | 32 | 81.07 | 0.81 |
| AV | JD | STTR1_11_028 | 126 | 43 | 74.56 | 0.75 |
| PZ | AV | STTR1_12_029 | 130 | 39 | 76.92 | 0.77 |
| PZ | AV | STTR1_13_023 | 134 | 35 | 79.29 | 0.79 |
| ZB | PZ | STTR1_14_036 | 131 | 38 | 77.51 | 0.78 |
| ZB | PZ | STTR1_15_032 | 141 | 28 | 83.43 | 0.83 |
| PZ | AV | STTR1_20_034 | 134 | 35 | 79.29 | 0.79 |
| PZ | JD | STTR1_21_037 | 145 | 24 | 85.8 | 0.86 |
| ZB | PZ | STTR1_22_045 | 141 | 28 | 83.43 | 0.83 |
| ZB | PZ | STTR1_23_043 | 138 | 31 | 81.66 | 0.82 |
| AV | JD | STTR1_27_048 | 146 | 23 | 86.39 | 0.86 |
| AV | JD | STTR1_26_047 | 134 | 35 | 79.29 | 0.79 |
| PZ | JD | STTR1_28_051 | 146 | 23 | 86.39 | 0.86 |
| ZB | PZ | STTR1_30_050 | 155 | 14 | 91.72 | 0.92 |
| ZB | PZ | STTR1_31_054 | 144 | 25 | 85.21 | 0.85 |
| MS | JL | STTR1_34_057 | 126 | 43 | 74.56 | 0.75 |
| MS | JL | STTR1_35_055 | 133 | 36 | 78.7 | 0.79 |
| MS | JL | STTR1_36_059 | 145 | 24 | 85.8 | 0.86 |
| MS | JL | STTR1_37_060 | 132 | 37 | 78.11 | 0.78 |
| MS | JL | STTR1_38_062 | 146 | 23 | 86.39 | 0.86 |
| MS | JL | STTR1_39_058 | 122 | 47 | 72.19 | 0.72 |
| MS | JL | STTR1_40_063 | 137 | 32 | 81.07 | 0.81 |
| MS | JL | STTR1_41_065 | 147 | 22 | 86.98 | 0.87 |
| MS | JL | STTR1_42_064 | 144 | 25 | 85.21 | 0.85 |
| MS | JL | STTR1_43_066 | 136 | 33 | 80.47 | 0.8 |
| MS | JL | STTR1_44_068 | 132 | 37 | 78.11 | 0.78 |
| MS | JL | STTR1_45_070 | 141 | 28 | 83.43 | 0.83 |
| MS | JL | STTR1_46_069 | 145 | 24 | 85.8 | 0.86 |
| MS | JL | STTR1_47_071 | 139 | 30 | 82.25 | 0.82 |
| MS | JL | STTR1_48_072 | 139 | 30 | 82.25 | 0.82 |

**Notes.** This table presents interrater reliability (IRR) metrics for 38 of the 47 transcripts that were double coded as part of the thematic analysis. Each transcript was independently coded by two trained coders using a shared codebook. Agreements, disagreements, percent agreement, and Cohen’s Kappa (κ) are reported. Kappa values ranged from 0.72 to 0.92, reflecting substantial to almost perfect agreement (Landis & Koch, 1977). The remaining 9 transcripts were also double-coded, but IRR could not be computed due to insufficient overlapping code segments or export issues; discrepancies for these were resolved through consensus.
